# Supplementary material
Source: publisher figshare collection journal article supplement (https://rs.figshare.com/ndownloader/files/12818501)
Supplement: Supplementary file 1 [file 12818501]

## Sheet: Sheet1
Species	min_length	max_length	AFDM_min	AFDM_max
Theodoxus fluviatilis	1	9	8.46154e-05	0.0105
Radix balthica	1	11	0.000116667	0.0078
Potamopyrgus antipodarum	2	5	0.000164286	0.0009375
Hydrobia spp.	2	8	0.000173333	0.0015
Bithynia tentaculata	3	12	0.0007	0.0108
